# Supplementary material
Source: PubMed Central journal article supplement (PMC4822984)
Supplement: f-72-00282-sup1.pdf [file f-72-00282-sup1.pdf]

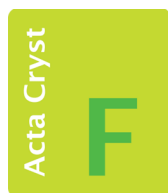

STRUCTURAL BIOLOGY  
COMMUNICATIONS

**Volume 72 (2016)**

**Supporting information for article:**

**Isolation, crystallization and crystal structure determination of  
the bovine kidney Na<sup>+</sup>,K<sup>+</sup>-ATPase**

**Jonas Lindholt Gregersen, Daniel Mattle, Natalya U. Fedosova, Poul  
Nissen and Linda Reinhard**

## Supporting Figures

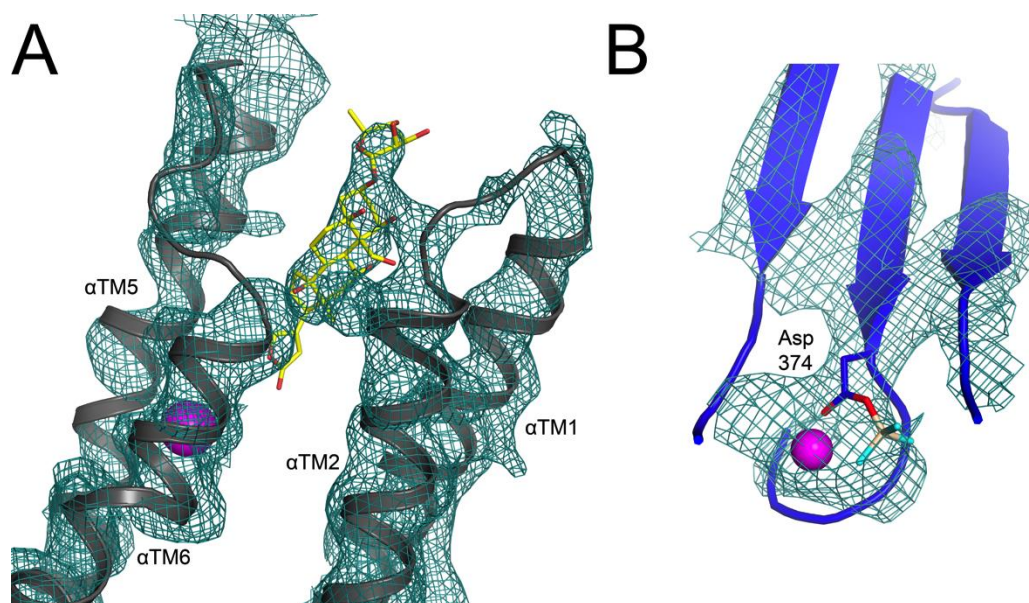

**Figure S1** Simple composite omit map (blue mesh) around **A**) the ouabain binding site located at the extracellular side of the  $\alpha$ TM domain (in gray) shown at 1.5 r.m.s.d. and **B**) at the  $\text{BeF}_3^-$  substituted phosphorylation site of Asp374 located in the P-domain shown at 3.5 r.m.s.d.. Magnesium ions are shown in magenta spheres.
